# Supplementary material for: Comprehensive Molecular Dissection of Dermatophilus congolensis Genome and First Observation of tet(Z) Tetracycline Resistance
Source: MDPI journal article supplement (doi:10.3390/ijms22137128), 2021-07-01
Supplement: s1 [file s1]

**Supplementary Table 3.** Gene clusters of secondary metabolites found in 40 genomes of *D. congolensis* detected by antiSMASH software 5.0.

| Genome | Secondary metabolite gene cluster |             |             |         |
|--------|-----------------------------------|-------------|-------------|---------|
|        | NRPS                              | Bacteriocin | Siderophore | Terpene |
| BTSK1  | 2                                 | 1           | -           | -       |
| BTSK2  | 2                                 | 1           | -           | -       |
| BTSK3  | 2                                 | -           | -           | -       |
| BTSK4  | 2                                 | -           | 1           | -       |
| BTSK5  | 2                                 | -           | -           | -       |
| BTSK6  | 2                                 | -           | -           | -       |
| BTSK7  | 2                                 | 1           | -           | -       |
| BTSK8  | 2                                 | 1           | -           | -       |
| BTSK9  | 2                                 | -           | -           | -       |
| BTSK10 | 2                                 | -           | -           | -       |
| BTSK11 | 2                                 | -           | -           | -       |
| BTSK12 | 2                                 | -           | -           | -       |
| BTSK13 | 2                                 | -           | 1           | -       |
| BTSK14 | 2                                 | -           | -           | -       |
| BTSK15 | 2                                 | -           | 1           | -       |
| BTSK16 | 2                                 | -           | 1           | -       |
| BTSK17 | 2                                 | 1           | -           | -       |
| BTSK18 | 2                                 | -           | 1           | -       |
| BTSK19 | 2                                 | -           | 1           | -       |
| BTSK20 | 2                                 | -           | -           | -       |
| BTSK21 | 2                                 | 1           | -           | -       |
| BTSK22 | 2                                 | -           | -           | 1       |
| BTSK23 | 2                                 | -           | 1           | -       |
| BTSK24 | 1                                 | -           | 1           | -       |
| BTSK25 | 2                                 | -           | -           | -       |
| BTSK26 | 2                                 | -           | 1           | -       |
| BTSK27 | 2                                 | 1           | -           | -       |
| BTSK28 | 2                                 | -           | -           | -       |
| BTSK29 | 2                                 | -           | 1           | -       |
| BTSK30 | 2                                 | -           | 1           | -       |
| BTSK31 | 2                                 | 1           | -           | -       |
| BTSK32 | 2                                 | -           | -           | -       |
| BTSK33 | 2                                 | -           | 1           | -       |
| BTSK34 | 2                                 | 1           | -           | 1       |
| BTSK35 | 2                                 | -           | -           | -       |
| BTSK36 | 2                                 | -           | -           | 1       |
| BTSK37 | 2                                 | -           | 1           | 1       |
| BTSK38 | 2                                 | -           | -           | -       |
| BTSK39 | 2                                 | -           | -           | -       |
| BTSK40 | 2                                 | -           | -           | -       |
