# Supplementary material for: Comprehensive Molecular Dissection of Dermatophilus congolensis Genome and First Observation of tet(Z) Tetracycline Resistance
Source: MDPI journal article supplement (doi:10.3390/ijms22137128), 2021-07-01
Supplement: s1 [file s1]

Supplementary Table 2. Virulence factor matches in Virulence Factor DataBase (VFDB) and protein identity determine through BLASTp.

| Virulence Factor Class           | Annotation from <i>D. congolensis</i> genomes | Gene               | Species                                | Identity % | Accession #                    |
|----------------------------------|-----------------------------------------------|--------------------|----------------------------------------|------------|--------------------------------|
| Adherence                        | GroEL chaperonin                              | <i>groEL</i>       | <i>M. tuberculosis</i>                 | 72         | <a href="#">CNF16026.1</a>     |
|                                  | Streptococcal plasmin receptor/               | <i>plr/gapA</i>    | <i>Str. pneumoniae</i>                 | 65         | <a href="#">CKE63244.1</a>     |
| Iron uptake                      | ABC transporter                               | <i>fagA</i>        | <i>M. tuberculosis</i>                 | 51         | <a href="#">CNK55089.1</a>     |
|                                  | Iron siderophore ABC transporter              | <i>fagD</i>        | <i>Mycobacterium sp</i><br>LNNU 331112 | 38         | <a href="#">WP_149359153.1</a> |
|                                  | Exochelin                                     | <i>fxbA</i>        | <i>M. smegmatis</i>                    | 50         | <a href="#">WP_029104465.1</a> |
|                                  | Exochelin                                     | <i>fxuB</i>        | <i>Corynebacteriales</i>               | 61         | <a href="#">WP_064906802.1</a> |
|                                  | Iron/manganese transport                      | <i>sitA</i>        | <i>Mycobacteraceae</i>                 | 73         | <a href="#">WP_019511651.1</a> |
|                                  |                                               | <i>sitB</i>        | <i>Mycobacterium sp</i><br>LNNU 331112 | 61         | <a href="#">WP_149359937.1</a> |
|                                  | Mycobactin (Mycobacterium)                    | <i>mbtH</i>        | <i>Mycobacteriaceae</i>                | 64         | <a href="#">WP_046283878.1</a> |
|                                  | Antranilate synthase component 1              | <i>mbtI</i>        | <i>M. sp</i> LNNU 331112               | 57         | <a href="#">WP_149360889.1</a> |
|                                  | ABC transporter                               | <i>irtA</i>        | <i>M. sp.</i> OK889                    | 45         | <a href="#">TDR65420.1</a>     |
| Regulation                       | Diphtheria toxin repressor DtxR               | <i>IdeR</i>        | <i>M. tuberculosis</i>                 | 54         | <a href="#">CNI59779.1</a>     |
|                                  | (p)ppGpp synthesis and hydrolysis             | <i>relA</i>        | <i>M. tuberculosis</i>                 | 53         | <a href="#">CNF85191.1</a>     |
|                                  | Response regulator transcription factor       | <i>(devR/dosR)</i> | <i>Mycobacterium sp.</i>               | 52         | <a href="#">SBS74131.1</a>     |
|                                  | Response regulator transcription factor       | <i>phoP</i>        | <i>M. tuberculosis</i>                 | 66         | <a href="#">CNE26216.1</a>     |
|                                  |                                               | <i>phosR</i>       | <i>M. pseudoshottsii</i><br>JCM 15466  | 43         | <a href="#">GAQ32061.1</a>     |
|                                  | Response regulator transcription factor       | <i>(regX3)</i>     | <i>M. tuberculosis</i>                 | 74         | <a href="#">CNE05134.1</a>     |
|                                  | RNA polymerase Sigma factor                   | <i>sigA</i>        | <i>M. tuberculosis</i>                 | 90         | <a href="#">CNI09155.1</a>     |
|                                  | RNA polymerase Sigma factor E                 | <i>sigE</i>        | <i>M. tuberculosis</i>                 | 72         | <a href="#">CND44553.1</a>     |
|                                  | RNA polymerase Sigma H (sigma-24)             | <i>sigH</i>        | <i>M. tuberculosis</i>                 | 74         | <a href="#">CNG47707.1</a>     |
|                                  | WhiB family transcription regulator 3         | <i>whib3</i>       | <i>Mycobacterium sp.</i><br>1245111.1  | 61         | <a href="#">WP_067342063.1</a> |
| Toxin                            | Phospholipase D                               | <i>pld</i>         | <i>C. ulcerans</i>                     | 59         | <a href="#">WP_029975046.1</a> |
| Acid resistance                  | Urease                                        | <i>ureB</i>        | <i>M. tuberculosis</i>                 | 61         | <a href="#">WP_057332578.1</a> |
|                                  | Urease                                        | <i>ureG</i>        | <i>Mycobacteria sp.</i><br>NAZ190054   | 64         | <a href="#">WP_067957749.1</a> |
| Amino acid and purine metabolism | Diaminopimelate decarboxylase                 | <i>lysA</i>        | <i>M. leprae</i>                       | 52         | <a href="#">Q50140.2</a>       |
|                                  | Purine synthesis                              | <i>purC</i>        | <i>M. tuberculosis</i>                 | 54         | <a href="#">CNJ22485.1</a>     |
|                                  | Tryptophan synthesis                          | <i>trpD</i>        | <i>M. leprae</i>                       | 52         | <a href="#">WP_010907993.1</a> |
|                                  | type I glutamate ligase                       | <i>glnA1</i>       | <i>M. leprae</i>                       | 61         | <a href="#">WP_010908444.1</a> |
| Anti-apoptosis factor            | NuoG(Mycobacterium)                           | <i>nuoG</i>        | <i>M. avium</i>                        | 61         | <a href="#">WP_084050036.1</a> |
| Antiphagocytosis                 | Nucleotide sugar dehydrogenase                | <i>fgd</i>         | <i>M. tuberculosis</i>                 | 68         | <a href="#">REN02080.1</a>     |
|                                  |                                               | <i>gnd</i>         | <i>Mycobacterium sp.</i><br>3519A      | 60         | <a href="#">WP_101946767.1</a> |
| Cell surface components          | Trehalose-recycling ABC transporter           | <i>sugA</i>        | <i>M. tuberculosis</i>                 | 55         | <a href="#">CND65206.1</a>     |
|                                  | Carbohydrate ABC transporter permease         | <i>sugB</i>        | <i>M. tuberculosis</i>                 | 63         | <a href="#">CND65175.1</a>     |
|                                  | Trehalose import ATP-binding protein          | <i>sugC</i>        | <i>M. tuberculosis</i>                 | 62         | <a href="#">CND65145.1</a>     |
| Copper uptake                    | Copper exporter                               | <i>ctpV</i>        | <i>M. sp</i> D16Q16                    | 52         | <a href="#">WP_139360043.1</a> |
| Endotoxin                        | O-antigen biosynthesis aminotransferase       | <i>bplF</i>        | <i>B. bronchiseptica</i>               | 53         | <a href="#">WP_033453820.1</a> |
| Immune evasion                   |                                               |                    |                                        |            |                                |

|                               |                                                      |              |                                     |    |                                |
|-------------------------------|------------------------------------------------------|--------------|-------------------------------------|----|--------------------------------|
|                               | Capsule (Staphylococcus)                             | <i>cap5G</i> | <i>S. aureus</i>                    | 51 | <a href="#">HAR5208460.1</a>   |
|                               | Exopolysaccharide (Haemophilus)                      | <i>pgi</i>   | <i>M. noviomagense</i>              | 61 | <a href="#">WP_083087194.1</a> |
|                               | polysaccharide biosynthesis protein                  | <i>gna</i>   | <i>Acinetobacter sp.</i><br>YH12025 | 56 | <a href="#">WP_180175575.1</a> |
| Motility and export apparatus | Flagellar                                            | <i>fliP</i>  | <i>Austwickia sp.</i>               | 67 | <a href="#">OOS02820.1</a>     |
| Others                        | O-antigen (Yersinia)                                 |              |                                     |    |                                |
|                               | Glucose-1-phosphate cytidyltransferase               | <i>ddhA</i>  | <i>Y. enterocolitica</i>            | 63 | <a href="#">WP_174847827.1</a> |
|                               | GDP-L-fucose synthase                                | <i>wcaG</i>  | <i>Y. pseudotuberculosis</i>        | 54 | <a href="#">AKA21002.1</a>     |
| Phagosome arresting           | Nucleoside diphosphate kinase (Mycobacterium)        | <i>ndk</i>   | <i>M. goodnae</i>                   | 61 | <a href="#">WP_180914471.1</a> |
| Protease                      | Proteasome-associated proteins                       | <i>mpa</i>   | <i>M. tuberculosis</i>              | 53 | <a href="#">CNF79738.1</a>     |
|                               | Zn++ metallophrotease (peptide m13)                  | <i>Zmp1</i>  | <i>M. Leprae</i>                    | 53 | <a href="#">SRX92647.1</a>     |
| Secretion system              | Mxi-Spa TTSS effectors controlled by MxiE (Shigella) | <i>lhgO</i>  | <i>Mycobacterium sp.</i><br>MS1601  | 54 | <a href="#">WP_083736669.1</a> |
|                               | T6SS-II                                              | <i>clpB</i>  | <i>M. tuberculosis</i>              | 68 | <a href="#">CNH94644.1</a>     |
| Stress adaptation             | Iron-co-factored SOD (Mycobacterium)                 | <i>sodA</i>  | <i>M. avium</i>                     | 64 | <a href="#">WP_062889796.1</a> |
| Nutritional virulence         | Pyrimidine biosynthesis                              | <i>carB</i>  | <i>M. tuberculosis</i>              | 74 | <a href="#">CNE60285.1</a>     |
